# Supplementary material for: Synthesis and characterisation of antimicrobial metal–organic frameworks as multi-drug carriers
Source: Royal Society of Chemistry journal article supplement (doi:10.1039/d4dt01100g), 2024-01-01
Supplement: d4dt01100g2.pdf [file d4dt01100g2.pdf]

## **SUPPORTING MATERIAL**

### **Synthesis and Characterisation of Antimicrobial Metal-Organic Frameworks as Multi-drug Carriers**

Ahmed Ahmed,<sup>a,b</sup> Aileen Kelly,<sup>b</sup> Dayle Leonard,<sup>c</sup> Waleed Saleem,<sup>b</sup> Andrey Bezrukov,<sup>d</sup> Constantinos G. Efthymiou,<sup>a</sup> Michael J. Zaworotko,<sup>a,d</sup> Davide Tiana,<sup>a,e</sup> Aoife Boyd,<sup>c</sup> and Constantina Papatriantafyllopoulou<sup>\*a,b</sup>

---

<sup>a.</sup> *SSPC The Science Foundation Ireland Research Centre for Pharmaceuticals*

<sup>b.</sup> *School of Biological and Chemical Sciences, College of Science and Engineering, University of Galway, H91 TK 33 Galway, Ireland; E-mail address: [constantina.papatriantafyllopo@universityofgalway.ie](mailto:constantina.papatriantafyllopo@universityofgalway.ie); Tel: +353 91 493462.*

<sup>c.</sup> *School of Natural Sciences, College of Science and Engineering, University of Galway, H91 TK 33 Galway, Ireland.*

<sup>d.</sup> *Department of Chemical Sciences, Bernal Institute, University of Limerick, Limerick, V94T9PX, Republic of Ireland.*

<sup>e.</sup> *School of Chemistry, University College Cork, College Road, Cork, Ireland.*

**Table S1.** Unit cell parameters of the **OnG6** and **Mg<sub>2</sub>(olsalazine)** MOFs. Due to the low number of diffraction peaks the structures of the **OnG6** MOFs were solved in the lowest symmetry space group *P6*, in contrast to the **M<sub>2</sub>(olsalazine)** frameworks, which were solved in the *P3<sub>2</sub>21* space group.

| Parameter               | <b>OnG6-Zn</b> | <b>OnG6-Mg</b> | <b>OnG6-Cu</b> | <b>OnG6-Co</b> | <b>Mg<sub>2</sub>(olsalazine)</b> |
|-------------------------|----------------|----------------|----------------|----------------|-----------------------------------|
| Space Group             | <i>P6</i>      | <i>P6</i>      | <i>P6</i>      | <i>P6</i>      | <i>P3<sub>2</sub>21</i>           |
| <i>a</i> / Å            | 24.61(3)       | 24.32(2)       | 24.45(3)       | 24.39(5)       | 24.97(5)                          |
| <i>b</i> / Å            | 24.61(3)       | 24.32(2)       | 24.25(3)       | 24.39(5)       | 24.97(5)                          |
| <i>c</i> / Å            | 5.894(7)       | 5.84(14)       | 5.81(4)        | 5.85(3)        | 6.72(4)                           |
| alpha / °               | 90             | 90             | 90             | 90             | 90                                |
| beta / °                | 90             | 90             | 90             | 90             | 90                                |
| gamma / °               | 120            | 120            | 120            | 120            | 120                               |
| volume / Å <sup>3</sup> | 3091(5)        | 2972(8)        | 2974(18)       | 3011(14)       | 3824(3)                           |

**Table S2.** INH loadings for the **OnG6** MOFs.

| <b>OnG6</b>    | <b>INH Loading</b> | <b>Framework Stoichiometry derived from <sup>1</sup>H-NMR spectrum</b> |
|----------------|--------------------|------------------------------------------------------------------------|
| <b>OnG6-Zn</b> | 4 wt%              | <b>Zn<sub>2</sub>(AZD)<sub>1</sub>(INH)<sub>0.12</sub></b>             |
| <b>OnG6-Mg</b> | 22 wt%             | <b>Mg<sub>2</sub>(AZD)<sub>1</sub>(INH)<sub>0.74</sub></b>             |
| <b>OnG6-Cu</b> | N/A                | <b>N/A</b>                                                             |

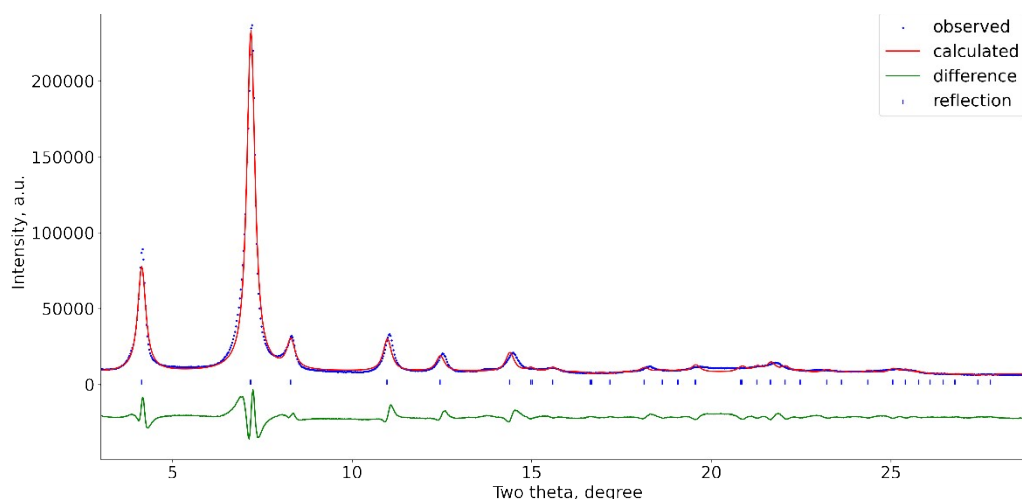

**Figure S1.** Pawley profile fit for **OnG7-Mg**.

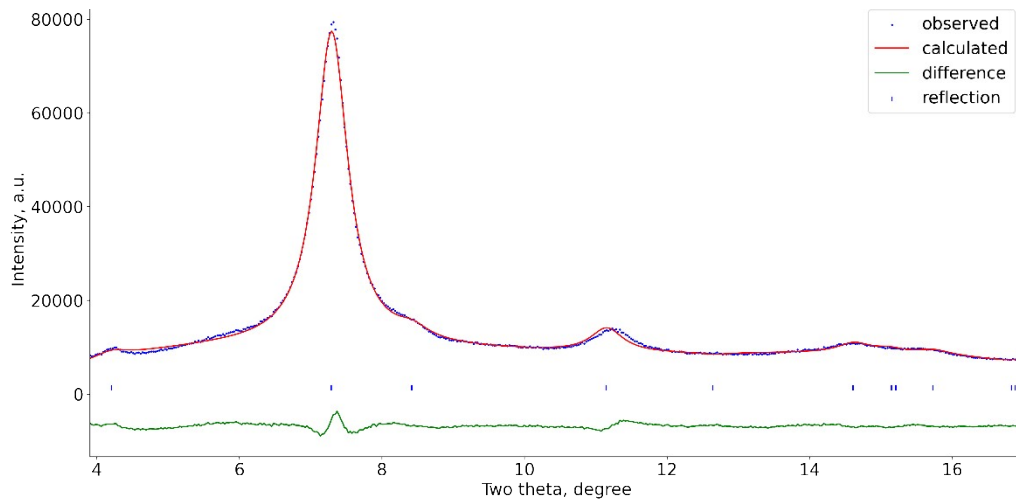

Figure S2. Pawley profile fit for **OnG6-Zn**.

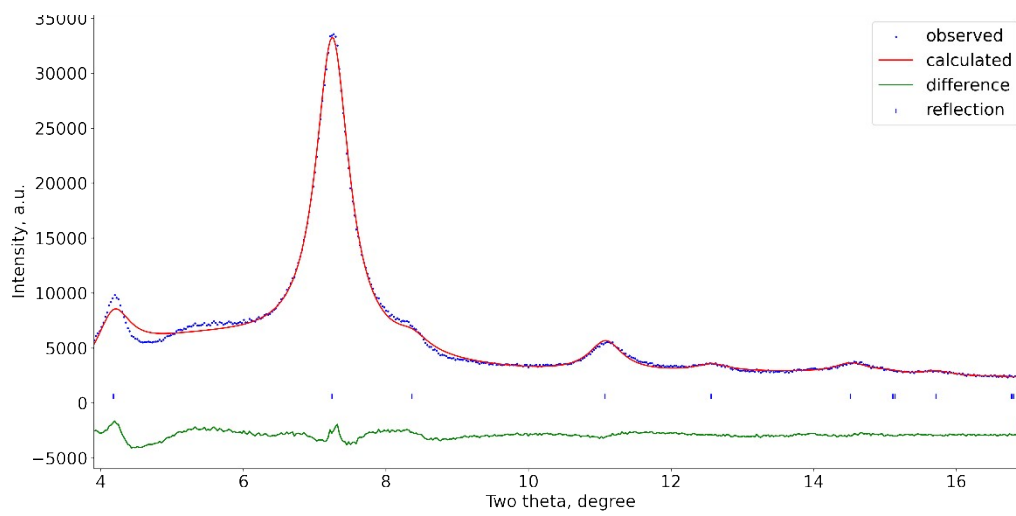

Figure S3. Pawley profile fit for **OnG6-Co**.

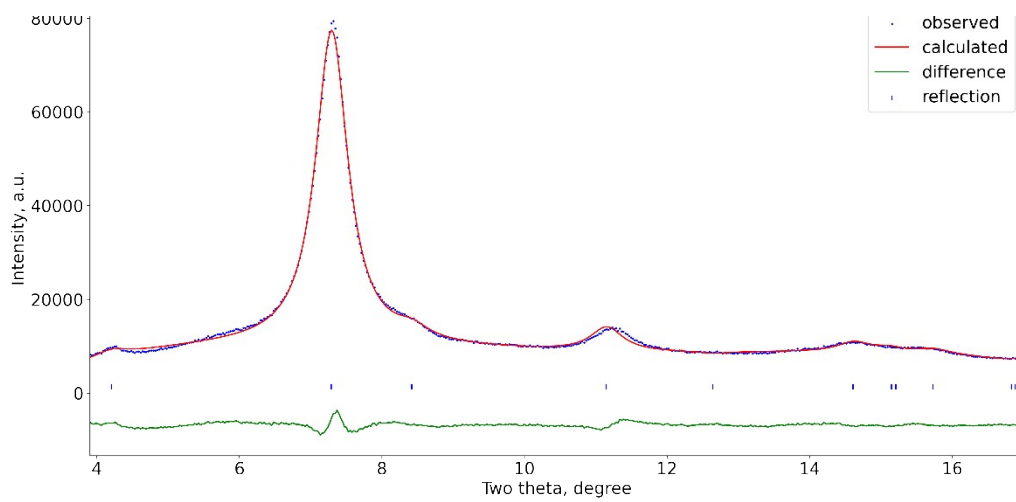

Figure S4. Pawley profile fit for **OnG6-Cu**.

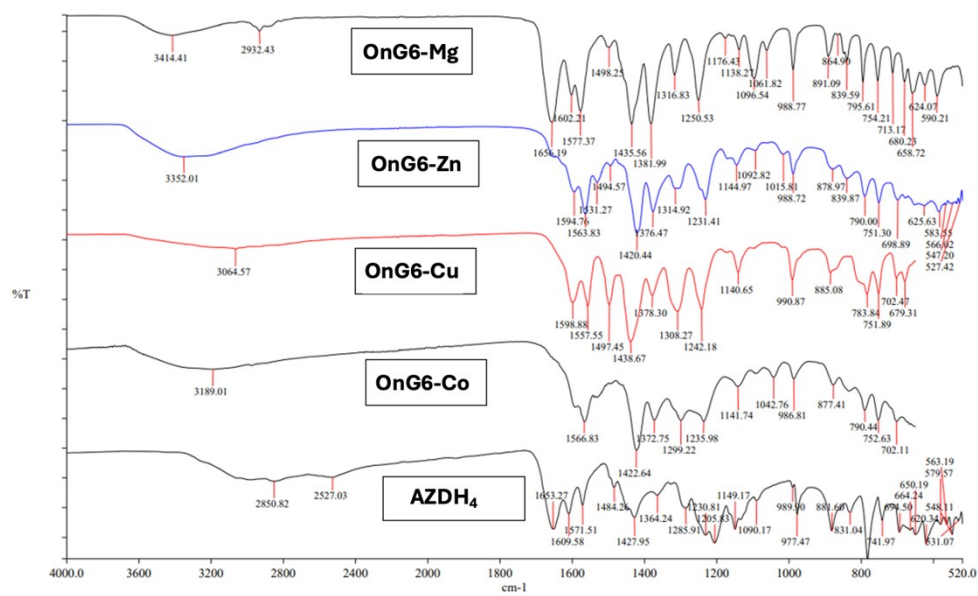

Figure S5. FTIR spectra of the **OnG6** MOFs and the linker **AZDH<sub>4</sub>**.

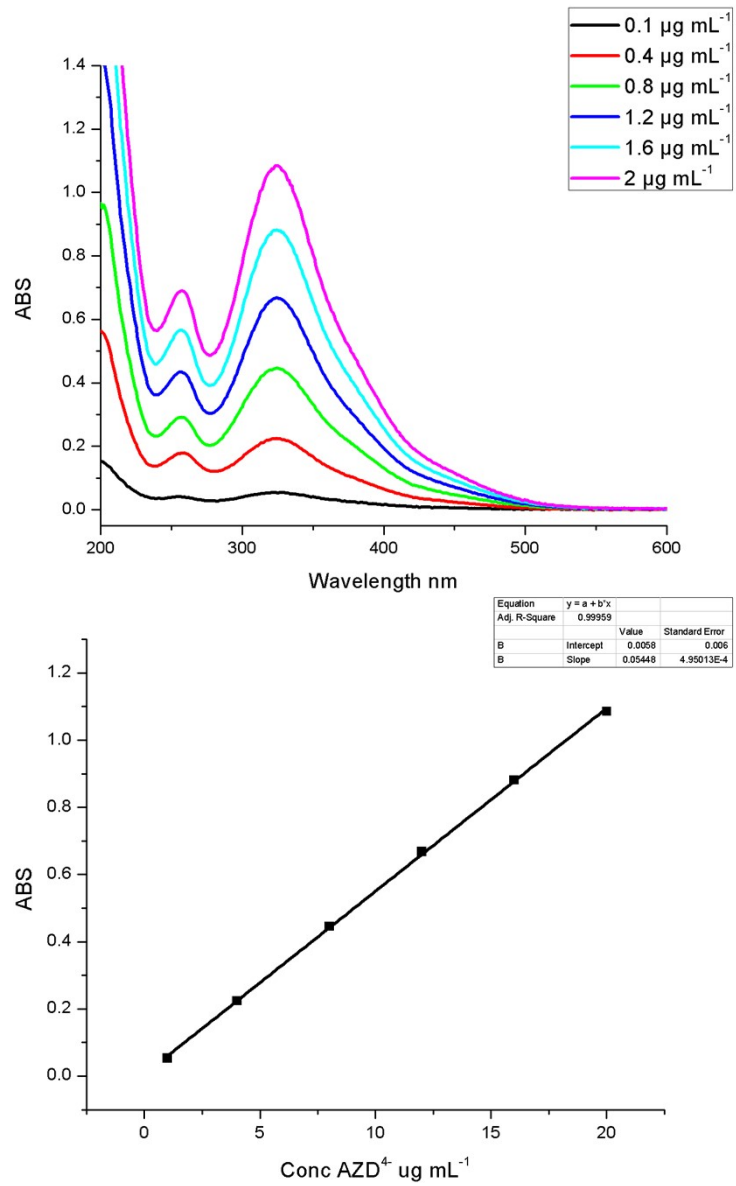

Figure S6. UV-Vis data (top) for Na<sub>4</sub>(AZD) calibration curve (bottom).

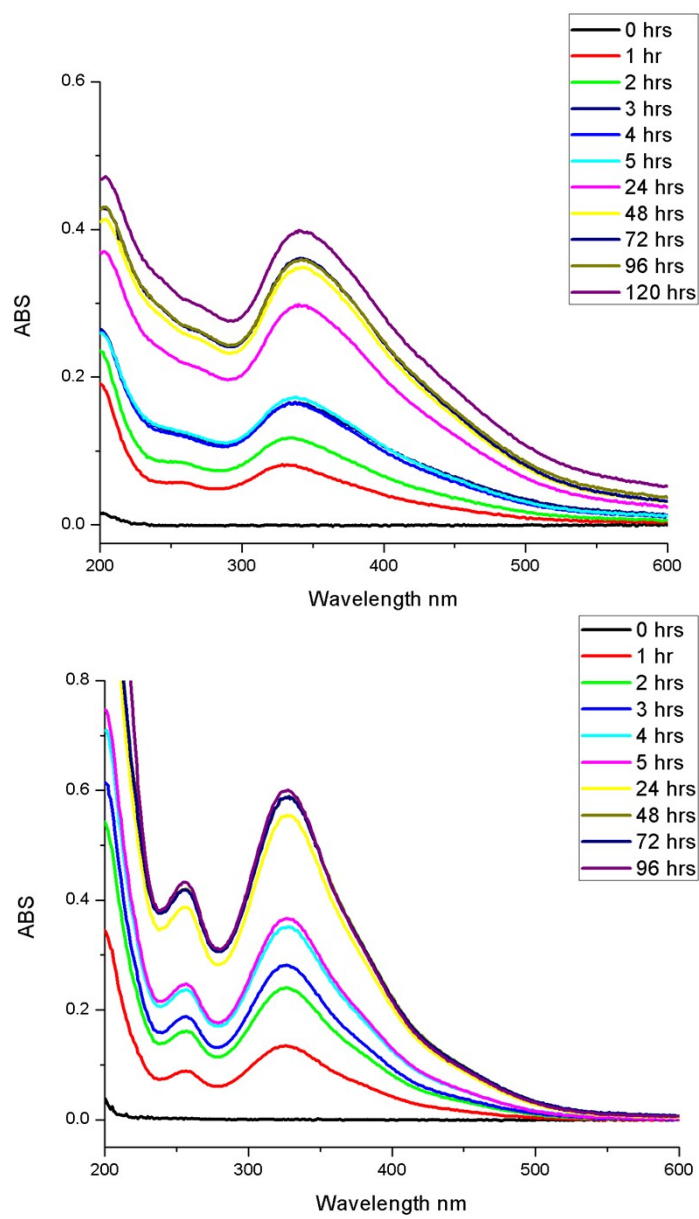

Figure S7. UV-Vis data for **OnG6-Cu** dissolution in H<sub>2</sub>O (top) and PBS solution.

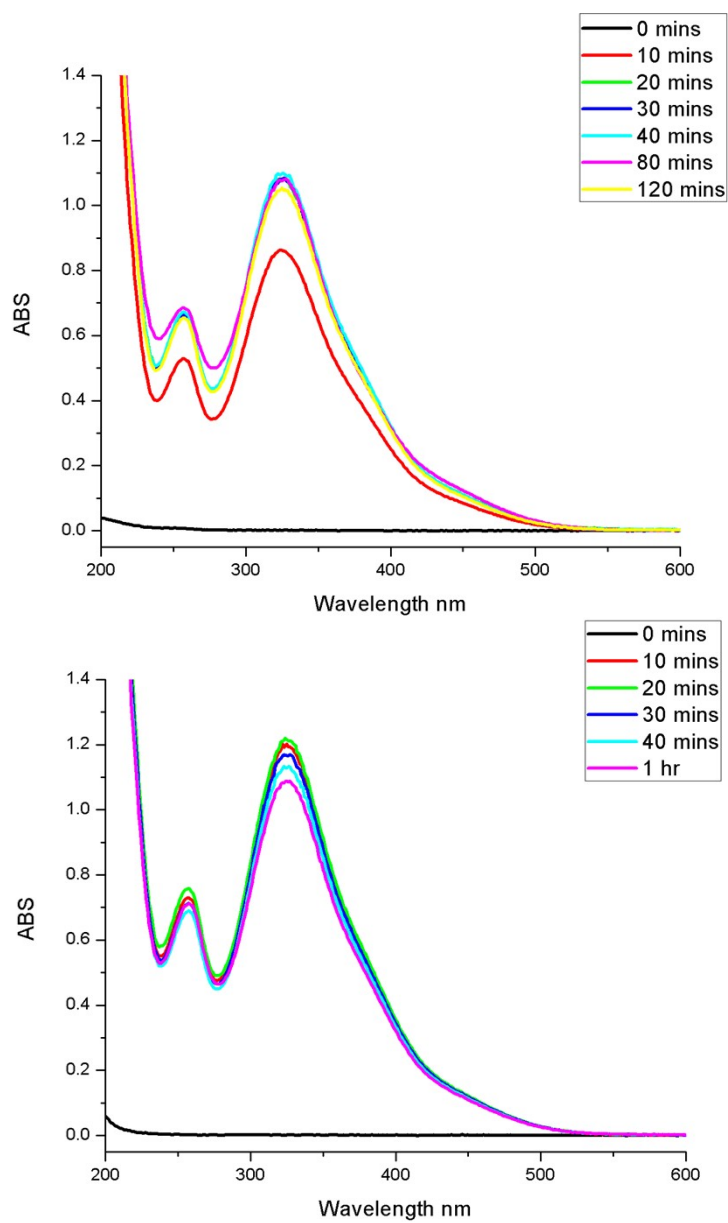

Figure S8. UV-Vis data for **OnG6-Mg** dissolution in H<sub>2</sub>O (top) and PBS solution.

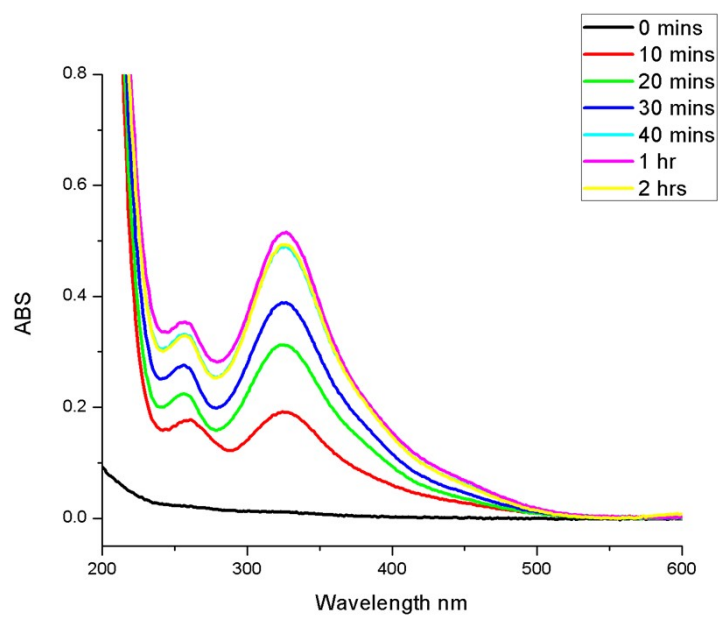

Figure S9. UV-Vis data for **OnG6-Zn** dissolution in water.

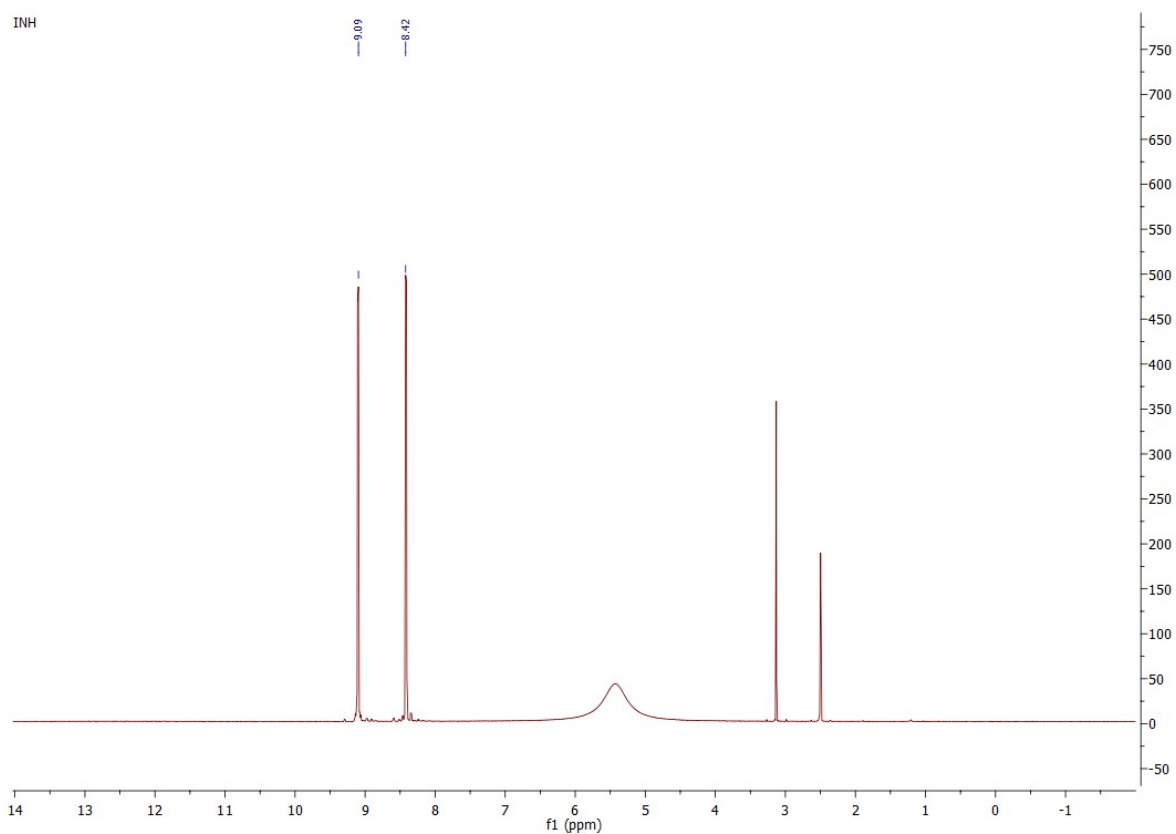

Figure S10. <sup>1</sup>H-NMR of INH in DMSO-d<sub>6</sub>/DCI.



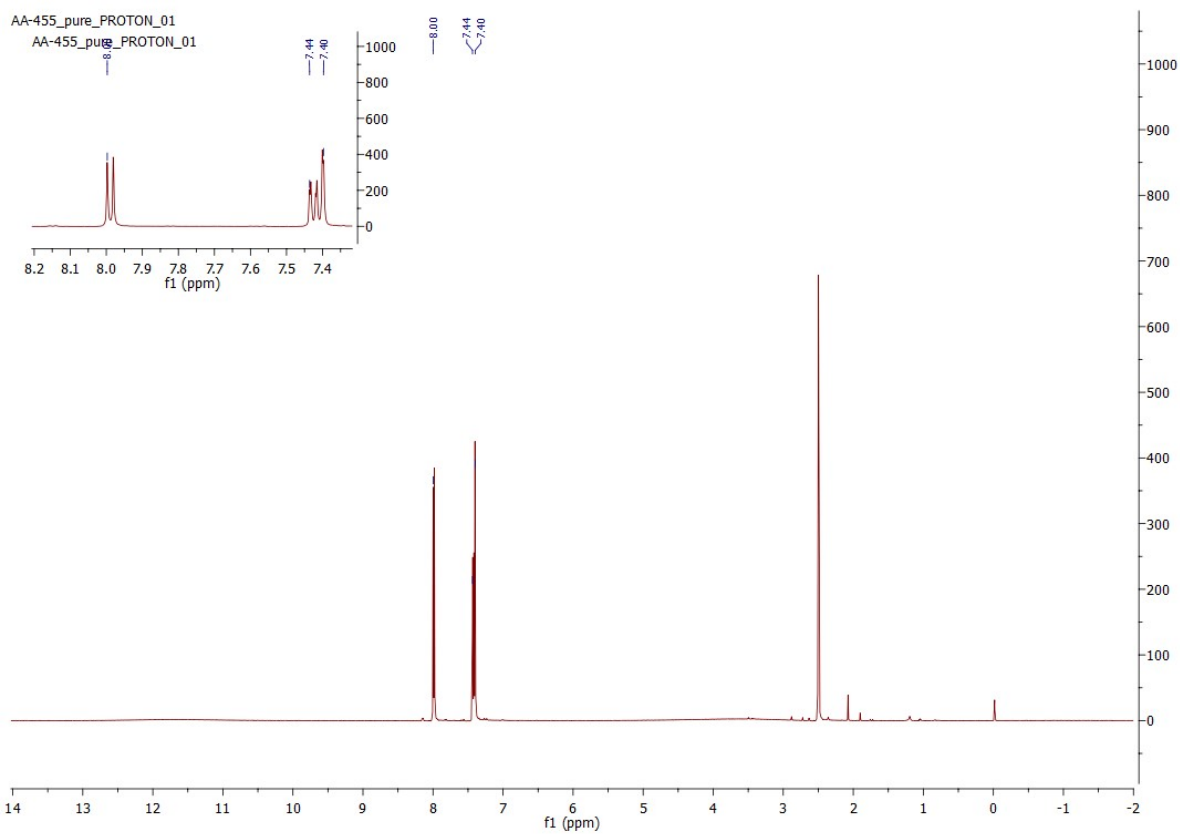

Figure S11.  $^1\text{H-NMR}$  of  $\text{AZDH}_4$  in  $\text{DMSO-d}_6$ .

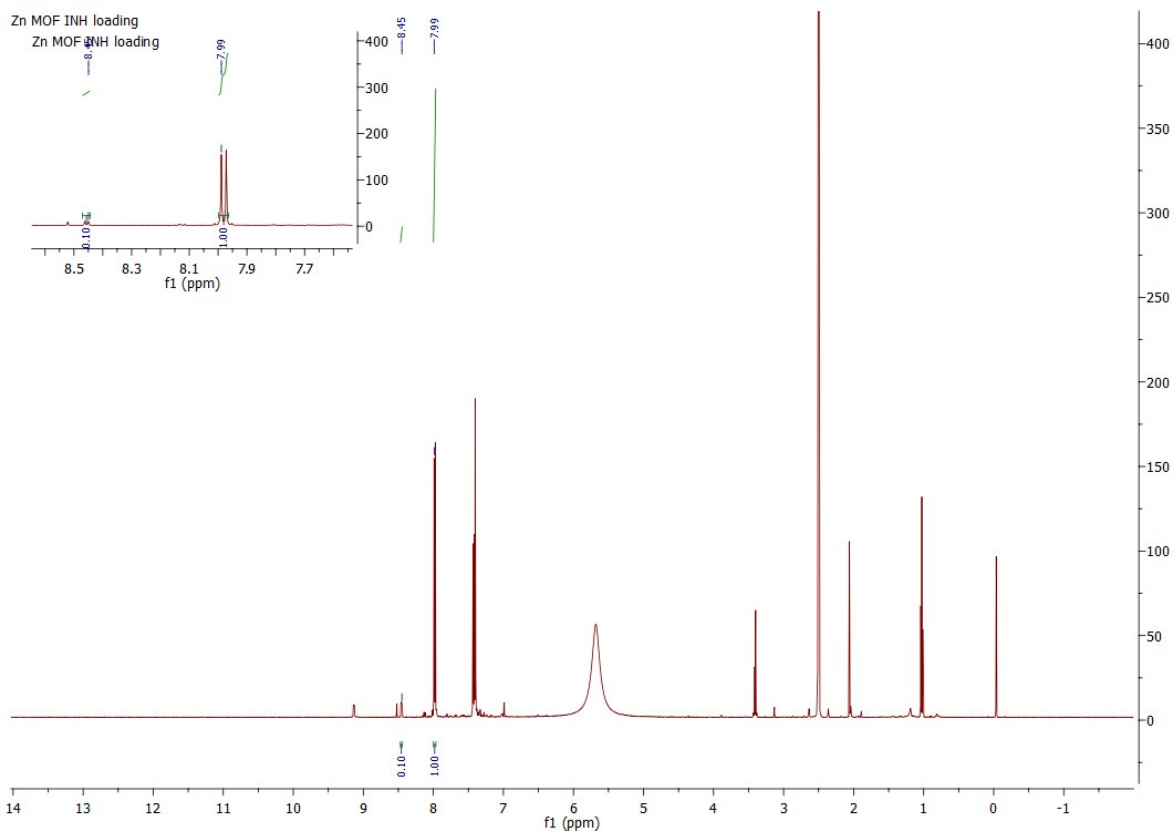

Figure S12.  $^1\text{H-NMR}$  of digested **OnG6-Zn** after INH loading (3 days) in  $\text{DMSO-d}_6/\text{DCI}$ .

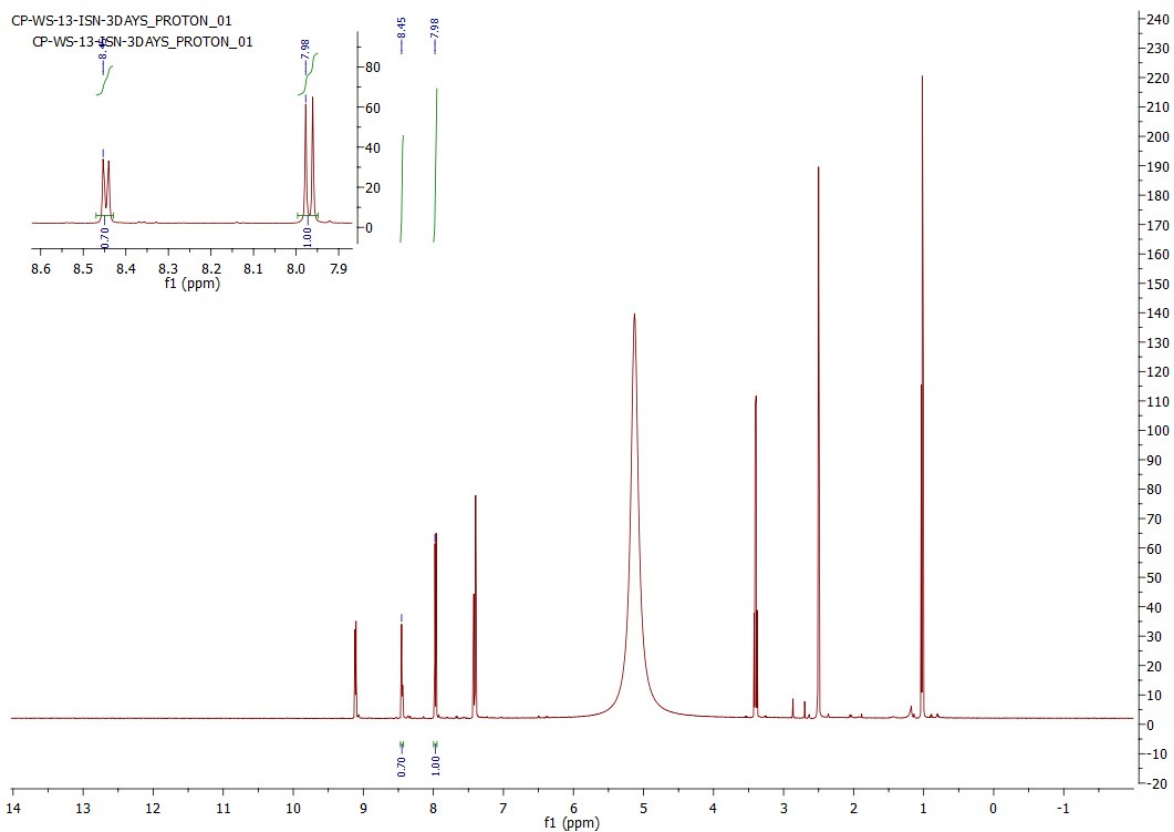

Figure S13.  $^1\text{H-NMR}$  of digested **OnG6-Mg** after INH loading (3 days) in  $\text{DMSO-d}_6/\text{DCI}$ .

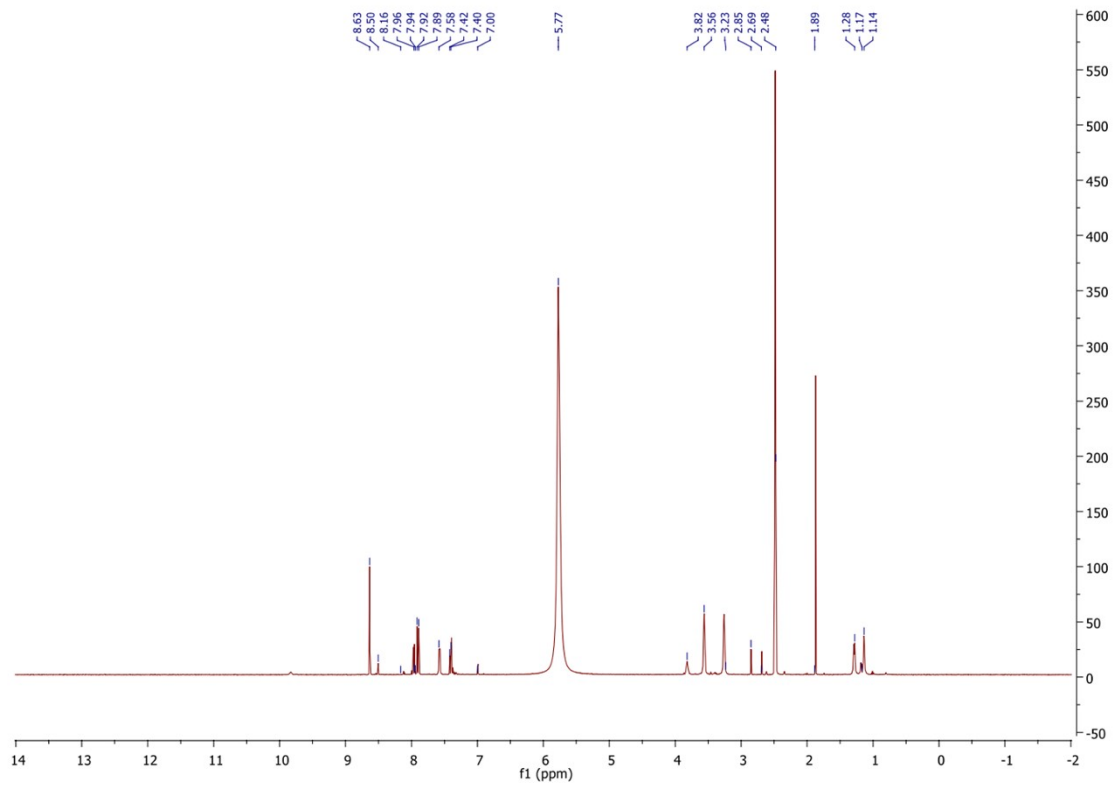

Figure S14.  $^1\text{H-NMR}$  of digested **OnG6-Mg** after CIPRO loading (3 days) in  $\text{DMSO-d}_6/\text{DCl}$ .

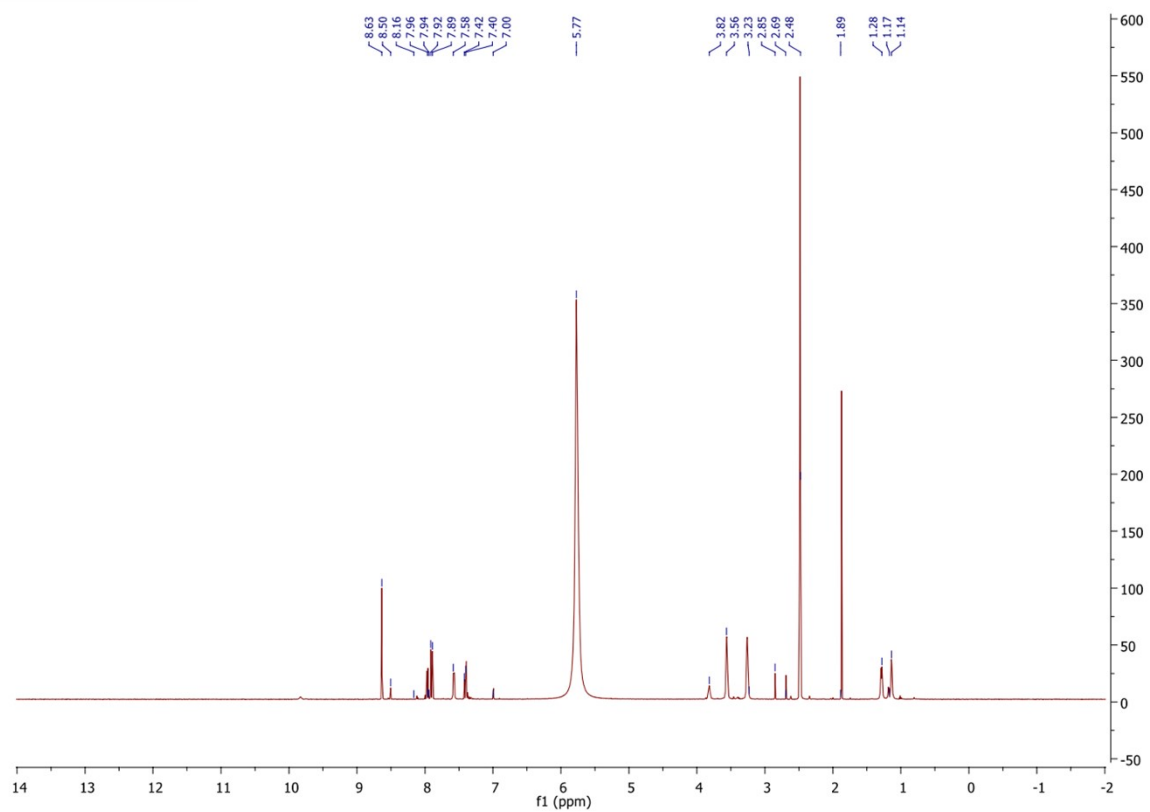

Figure S15. <sup>1</sup>H-NMR of digested **OnG6-Co** after CIPRO loading (3 days) in DMSO-d<sub>6</sub>/DCI.
